# Supplementary material for: Focus on host/organ unregulated response: a common cause of critical illness
Source: PubMed Central journal article supplement — Chin Med J (Engl). 2022 Dec 27;136(1):108–10. doi: 10.1097/CM9.0000000000002374 (PMC10106150; doi:10.1097/cm9.0000000000002374), 2022-12-27
Supplement: cm9-136-108-s001.pdf [file cm9-136-108-s001.pdf]

**Supplementary Table 1: Management of HOUR.**

|                                                             |                                                                                                                                                                                                                             |
|-------------------------------------------------------------|-----------------------------------------------------------------------------------------------------------------------------------------------------------------------------------------------------------------------------|
| Adequate sedation, analgesia, and antisympathetic activity  | <p>Blocking afferent impulses: NSAIDs</p> <p>Balance the excitation and inhibition in the brain: midazolam, propofol, dexmedetomidine, and ketamine</p> <p>Antisymphathetic activity: beta-blockers and dexmedetomidine</p> |
| Regulation of immune dysfunction and excessive inflammation | <p>Immune or inflammation modulation in targeted patients</p> <p>Blood purification</p>                                                                                                                                     |
| Management of metabolism and bioenergy                      | <p>Control hyperthermia</p> <p>Timely and adequate nutrition</p> <p>Mitochondria protection</p>                                                                                                                             |

HOUR: Host/organ unregulated response; NSAIDs: Nonsteroidal anti-inflammatory drugs.

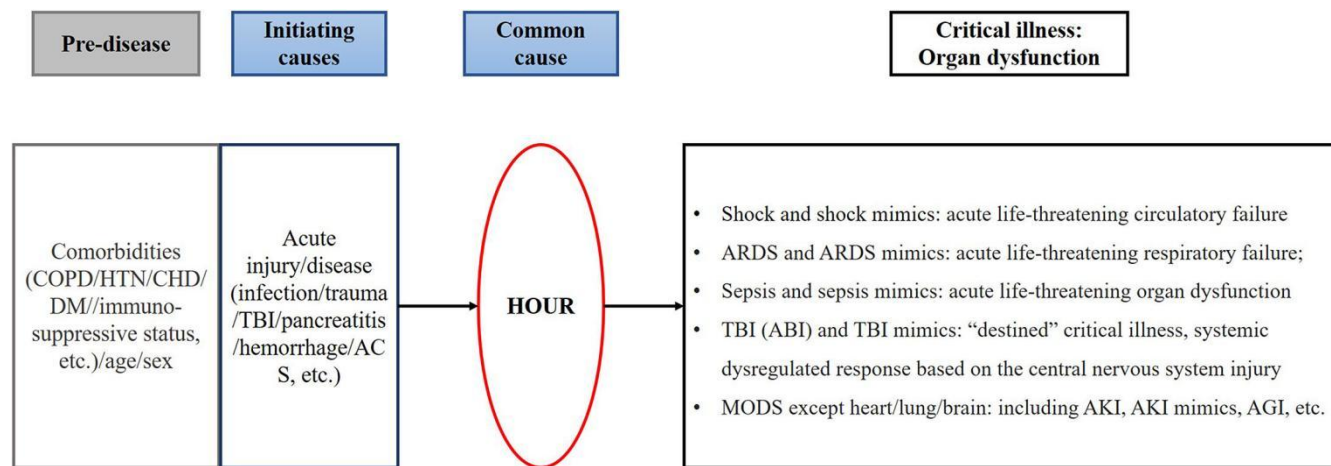

**Supplementary Figure 1: HOUR: Host/organ unregulated response.**
